# Supplementary material
Source: Springer Nature journal article supplement (https://www.springermedizin.de/resource/supplementary/13099_2010_42_MOESM3_ESM.pdf/9665388)

A

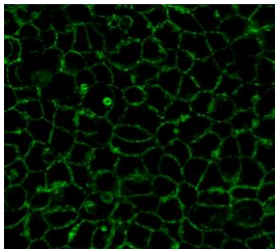

B

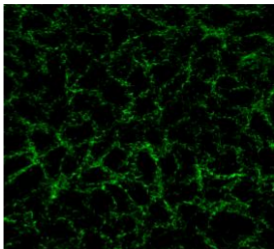

C

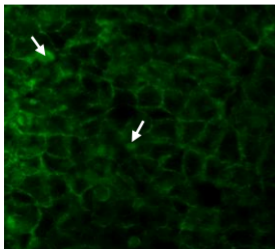

D

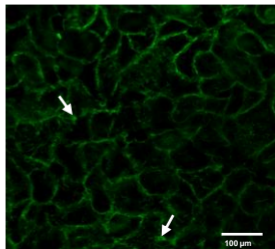

Supplement: MOESM3 [file 9665388]
